# Supplementary material for: Neurofilament Light Chain (NF‐L) Stimulates Lipid Peroxidation to Neuronal Membrane through Microglia‐Derived Ferritin Heavy Chain (FTH) Secretion
Source: Hindawi journal article supplement (doi:10.1155/2022/3938940), 2022-01-01

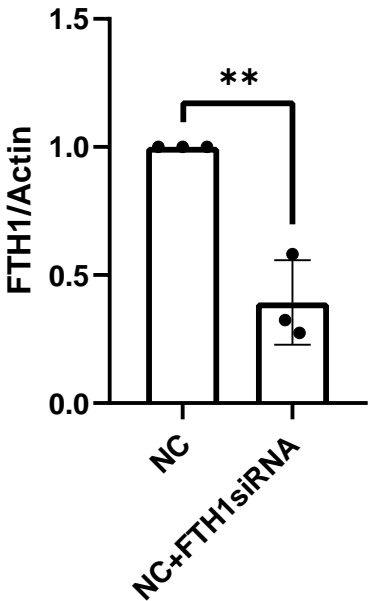

Supplement: f3 [file 3938940.f3.pdf]
